# Supplementary material for: Selenotungstates incorporating organophosphonate ligands and metal ions: synthesis, characterization, magnetism and catalytic efficiency in the Knoevenagel condensation reaction
Source: Royal Society of Chemistry journal article supplement (doi:10.1039/d0dt00444h), 2020-01-01
Supplement: d0dt00444h1.pdf [file d0dt00444h1.pdf]

<Supporting Information>

**Selenotungstates incorporating organophosphonate ligands  
and metal ions: synthesis, characterization, magnetism and  
catalytic efficiency in Knoevenagel condensation reaction**

Hui Kong, Peipei He, Zongfei Yang, Qiaofei Xu, Jiawei Wang, Ran Ban, Pengtao Ma, Jingping Wang\* and Jingyang Niu\*

*Henan Key Laboratory of Polyoxometalate Chemistry, Institute of Molecule and Crystal Engineering, College of Chemistry and Chemical Engineering, Henan University, Kaifeng, Henan 475004, P. R. China.*

Contains

Section1: Experimental section.

Section2: The infrared spectrum of the three POTs.

Section3: The PXRD of **Co1**, **Co2** and **Ni3**.

Section4: The ball-and-stick representation of **Co1**.

Section5: The structure and the coordination mode of **Co2** and **Ni3**.

Section6:  $\chi_M^{-1}$  vs  $T$  curve of three POTs.

Section7: The TGA curves of three POTs.

Section8: Additional catalysis related figure.

Section9: The IR spectrum and PXRD patterns after recycle catalysis.

Section10: BVS values of W, Se, Co and P atoms of compound **Co1**.

Section11: Bond length of compound **Co1**.

Section12: Angel length of compound **Co1**.

Section13: Crystallographic data of three compounds.

## Experimental section

### Synthesis of $\text{Na}_8\text{H}_4[\text{Co}(\text{H}_2\text{O})_4(\text{SeW}_6\text{O}_{21})_2(\text{CoL}_2)_3]\cdot 32\text{H}_2\text{O}$ (**Co1**)

$\text{Na}_{24}[\text{H}_6\text{Se}_6\text{W}_{39}\text{O}_{144}]\cdot 74\text{H}_2\text{O}$  (0.60 g, 0.052 mmol) and glyphosate (0.60 g, 3.55 mmol) were dissolved in 10 mL distilled water and then  $\text{CoCl}_2\cdot 6\text{H}_2\text{O}$  (0.24 g, 0.46 mmol) was added into the stirred solution until the solution dissolve completely. 15 minutes later, the 10 drops TMA were added and the pH value was carefully adjusted to about 5.9 with 6 mol/L NaOH solution. The claret-colored solution was stirred at 80 °C for 2.5 h, then the mixed solution was gradually cooled to room temperature and filtered. The colorless block shaped crystals of **Co1** were collected after about one week. Yield: 42.3% (0.159 g based on  $\text{CoCl}_2\cdot 6\text{H}_2\text{O}$ ). Elemental analysis (%) calcd for **Co1**: H, 1.65; C, 4.01; N, 1.56; P, 3.45; Co, 4.92; Se, 2.93; W, 40.94. Found: H, 1.67; C, 4.69; N, 1.71; P, 3.52; Co, 4.89; Se, 3.26; W, 40.68. IR (KBr,  $\text{cm}^{-1}$ ; s, strong; m, medium; w, weak): 3437 (s), 2112 (w), 1595 (s), 1425 (m), 1326 (s), 1303 (m), 1261 (s), 1217 (m), 1095 (s), 996 (m), 947 (s), 897 (s), 806 (s), 742 (s), 689 (s).

### Synthesis of $\text{Cs}_2\text{Na}_2\text{H}_8[\text{Co}(\text{H}_2\text{O})_4(\text{SeW}_6\text{O}_{21})_2(\text{CoL}_2)_3]\cdot 39\text{H}_2\text{O}$ (**Co2**)

The preparation of **Co2** was similar to **Co1**, but with 10 drops 1M CsCl instead of 10 drops TMA. The colorless block-shaped crystals of **Co2** were collected after about three days later. Yield: 36.8% (0.165 g based on  $\text{CoCl}_2\cdot 6\text{H}_2\text{O}$ ). Elemental analysis (%) calcd for: H, 2.04; C, 3.92; N, 1.52; P, 3.37; Co, 4.27; Se, 2.86; W, 40.03. Found: H, 1.96; C, 4.23; N, 1.49; P, 3.65; Co, 4.77; Se, 3.18; W, 40.35. IR (KBr,  $\text{cm}^{-1}$ ; s, strong; m, medium; w, weak): 3420 (s), 2125 (w), 1599 (s), 1423 (m), 1332 (s), 1307 (m), 1261 (w), 1222 (w), 1087 (s), 999 (s), 944 (s), 919 (s), 892 (s), 819 (s), 692 (s).

### Synthesis of $\text{Cs}_2\text{Na}_2\text{H}_8[\text{Ni}(\text{H}_2\text{O})_4(\text{SeW}_6\text{O}_{21})_2(\text{NiL}_2)_3]\cdot 36\text{H}_2\text{O}$ (**Ni3**)

$\text{Na}_{24}[\text{H}_6\text{Se}_6\text{W}_{39}\text{O}_{144}]\cdot 74\text{H}_2\text{O}$  (1.20 g, 0.104 mmol) and glyphosate (0.60 g, 3.55 mmol) were dissolved in 10 mL distilled water and stirred for 10 minutes. Then  $\text{NiCl}_2\cdot 6\text{H}_2\text{O}$  (0.24 g, 0.46 mmol) and CsCl (0.10 g, 0.50 mmol) were added into the solution. After stirring for 30 minutes, the PH was adjusted to 5.9 with 3M NaOH aqueous. After the solution was stirred at 80 °C for 1.5h. The remaining preparation of **Ni3** was similar to **Co1**. The blue block shaped crystals of **Ni3** were collected after about ten days. Yield: 40% (0.48 g based on  $\text{NiCl}_2\cdot 6\text{H}_2\text{O}$ ). Elemental analysis (%) calcd for: H, 1.98; C, 3.92; N, 1.52; P, 3.37; Ni, 4.26; Se, 2.87; W, 40.09; Found: H, 1.59; C, 3.79; N, 1.49; P, 3.49; Ni, 4.12; Se, 3.08; W, 39.57. IR (KBr,  $\text{cm}^{-1}$ ; s, strong; m, medium; w, weak): 1602 (s), 1393 (w), 1325 (m), 1230 (m), 1081 (s), 997 (s), 937 (s), 884 (m), 785 (s), 743 (s), 694 (w), 603 (m).

### The procedure of the catalysis

The ethanol (1 mL), benzaldehyde (1 mmol), ethyl cyanoacetate (1 mmol) and catalyst (0.3 mol%) were added into a tube at room temperature. Then, the mixture was stirred at the specified conditions on the parallel reactor. The product was carried on qualitative detection by GC-MS and the conversion was monitored by GC with benzaldehyde as internal standard.

As shown in **Fig. S1**, the IR spectrum showed the skeletal vibrations between 500 and 4000  $\text{cm}^{-1}$  for three compounds, which is consistent with the result of single-crystal X-ray structural analysis. It also indicated that the polyanions in **Co1**, **Co2**, and **Ni3** are isostructural. The three compounds have obvious characteristic absorption peaks at 700–1000  $\text{cm}^{-1}$ , which is the vibration of  $\text{W}-\text{O}_t$  and  $\text{W}-\text{O}-\text{W}$  in subunit  $\{\text{SeW}_6\text{O}_{21}\}$ . The absorption peaks of **Co1** at 1087  $\text{cm}^{-1}$  and **Co2** at 1095  $\text{cm}^{-1}$  and **Ni3** at 1097  $\text{cm}^{-1}$  can be respectively assigned to  $\text{P}-\text{O}$  vibrations. Compared the positions of carboxyl peaks in **Co1**, **Co2** and **Ni3** with those in glyphosate, it is found that the three compounds have a certain degree of red shift in the range of 1300-1600  $\text{cm}^{-1}$ , which may be the result of coordination between metal ions and carboxyl groups. In addition, the signal appearing at 2925  $\text{cm}^{-1}$  (**Co1**), 2920  $\text{cm}^{-1}$  (**Co2**) and 2912  $\text{cm}^{-1}$  (**Ni3**) is assigned to the  $\nu(\text{CH}_2)$  stretching vibration and the bands at 1583 and 1393  $\text{cm}^{-1}$  are attributed to the carboxyl characteristic vibrations. the signals appearing around 1600 $\text{cm}^{-1}$  and the peaks around 3450 $\text{cm}^{-1}$  are belonged to the flexural vibration and stretching of lattice and coordinated water molecules.

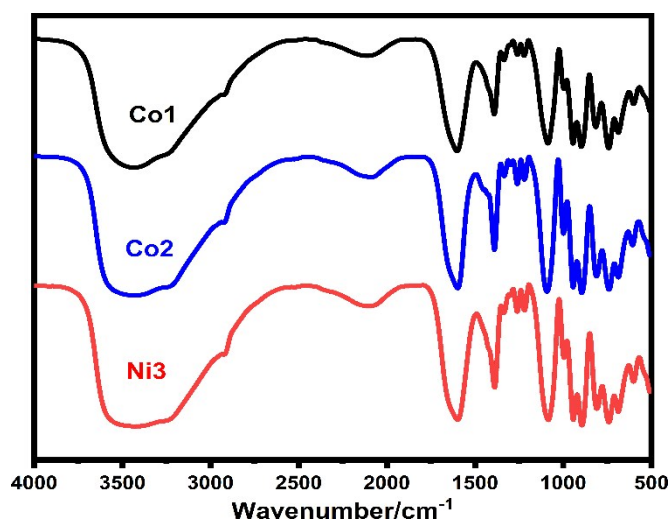

**Fig.S1.** The infrared spectrum of the three POMs.

As shown in **Fig. S2**, the experimental PXRD patterns for three POMs are consistent with the simulated patterns obtained from X-ray single-crystal diffraction, which indicate that the samples are pure. The differences of peak intensity between the experimental and simulated patterns might be due to the anisotropic effects of crystal.

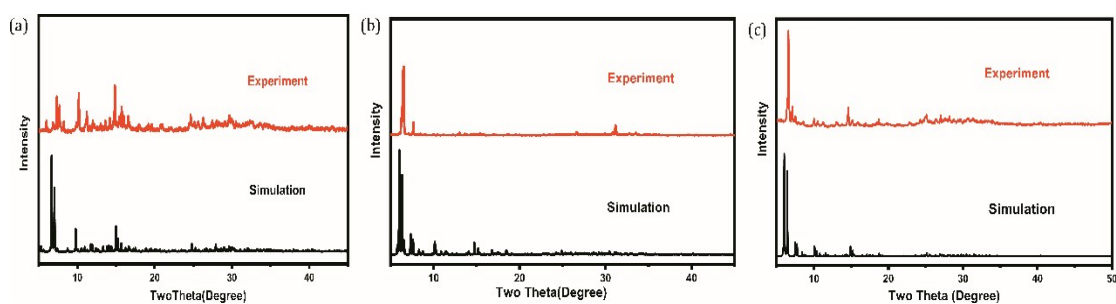

**Fig.S2.** The PXRD of Co1, Co2 and Ni3.

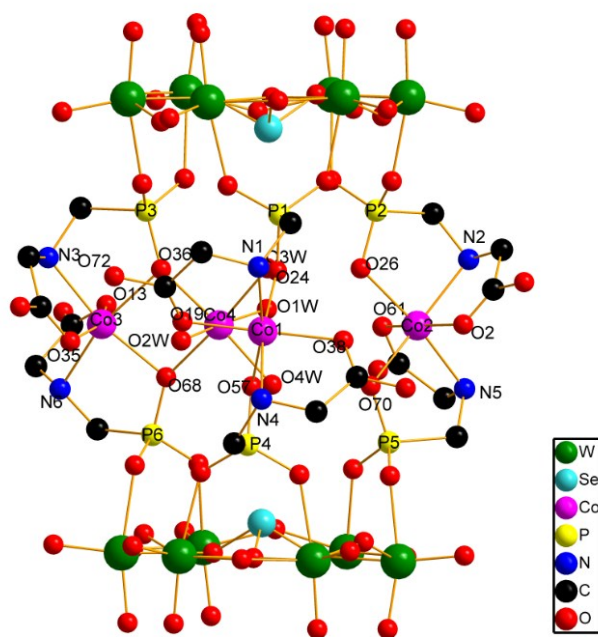

**Fig. S3.** The ball-and-stick representation of **Co1**.

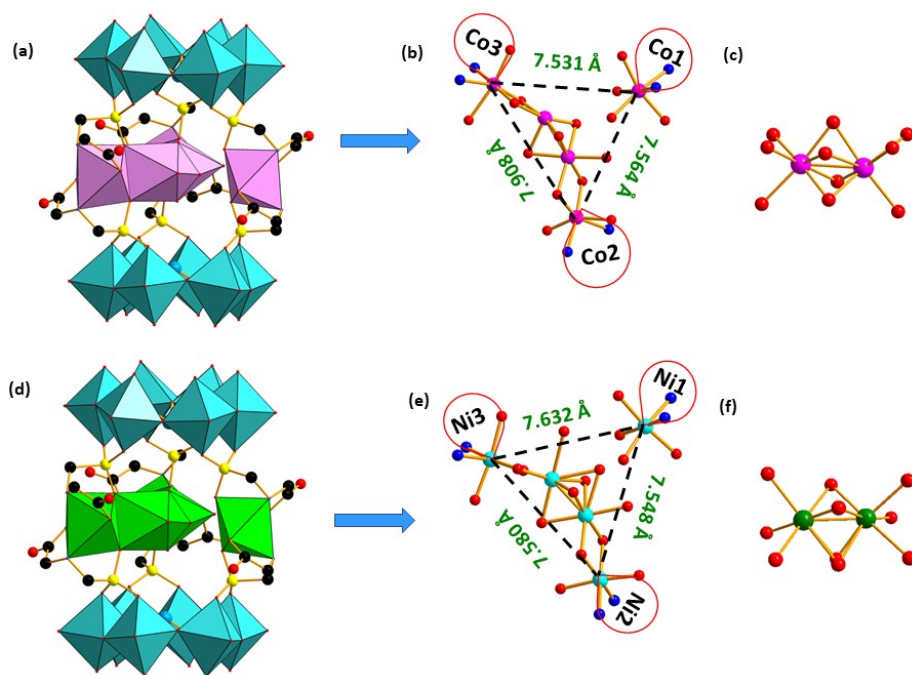

**Fig. S4.** (a) The polyhedral/ball-and-stick representation of **Co2**; (b) The ball-and-stick of the three Co atoms and a disordered Co atom; (d) The polyhedral/ball-and-stick representation of **Ni3**; (e) The ball-and-stick of the three Ni atoms and a disordered Ni atom, Color code:  $\text{WO}_6/\text{W}$ : blue,  $\{\text{NiO}_6\}$ :green,  $\{\text{CoO}_6\}$ : purple, P: yellow, Ni: green, C: black, N: blue, O: red. H atoms are omitted for clarity.

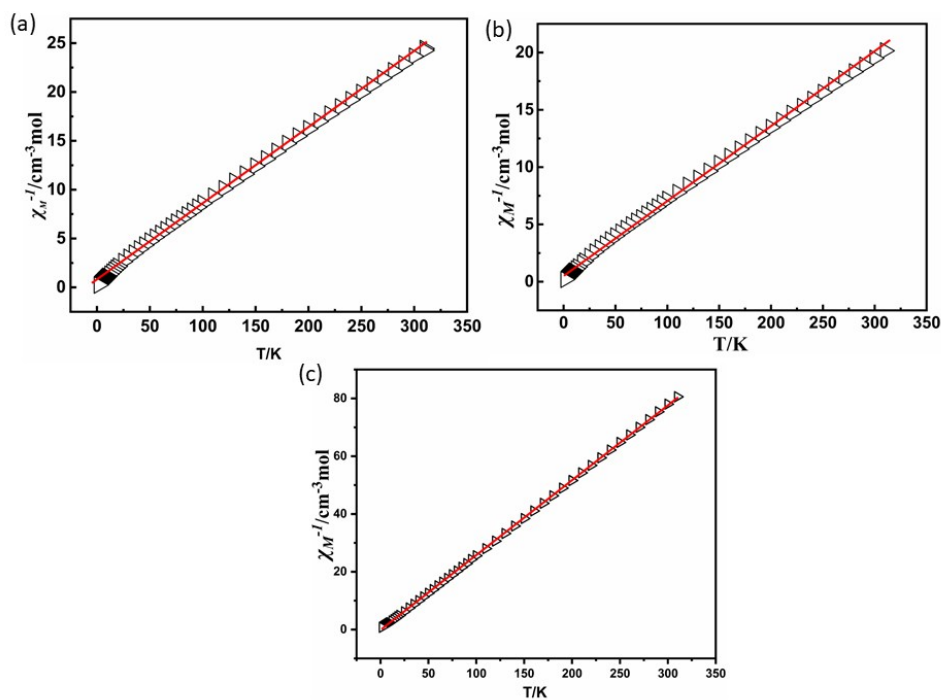

Fig. S5.  $\chi_M^{-1}$  vs  $T$  curve of **Co1** (a), **Co2** (b), **Ni3** (c).

Under the protection of  $N_2$ , the thermogravimetric analysis (TGA) curves of **Co1**, **Co2** and **Ni3** have been measured in the range of 25–850 °C. As shown in Fig. S6, three compounds showed two consecutive weight loss changes. The first step is that the actual weight loss of **Co1**, is about 11.18 % (theoretical value: 11.22%), **Co2** is about 12.05 % (theoretical value: 13.12 %) and **Ni3** is about 12.05 % (theoretical value: 12.22 %) in the temperature range of 25–300 °C, which correspond to the loss of crystal water and coordination water in **Co1**, **Co2** and **Ni3**, respectively. In the second step, the mass loss is between 300–850 °C, the actual weight loss of **Co1** is about 12.13%, **Co2** is about 10.77% and **Ni3** is about 13.70%, which correspond to the loss of organic phosphonic acid fragments, structural water and the sublimation of  $SeO_2$ .

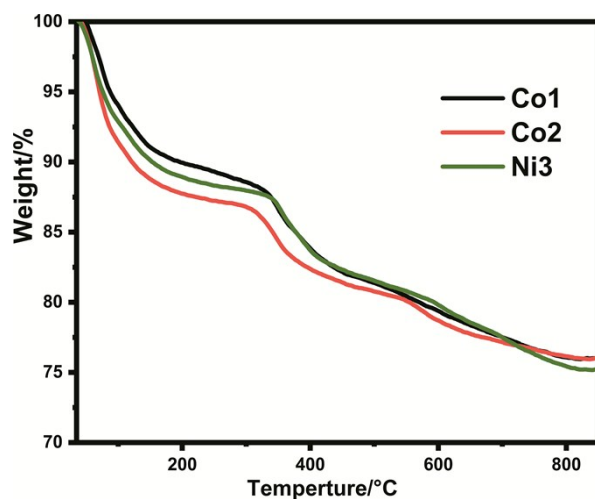

Fig. S6. The TGA curves of three compounds.

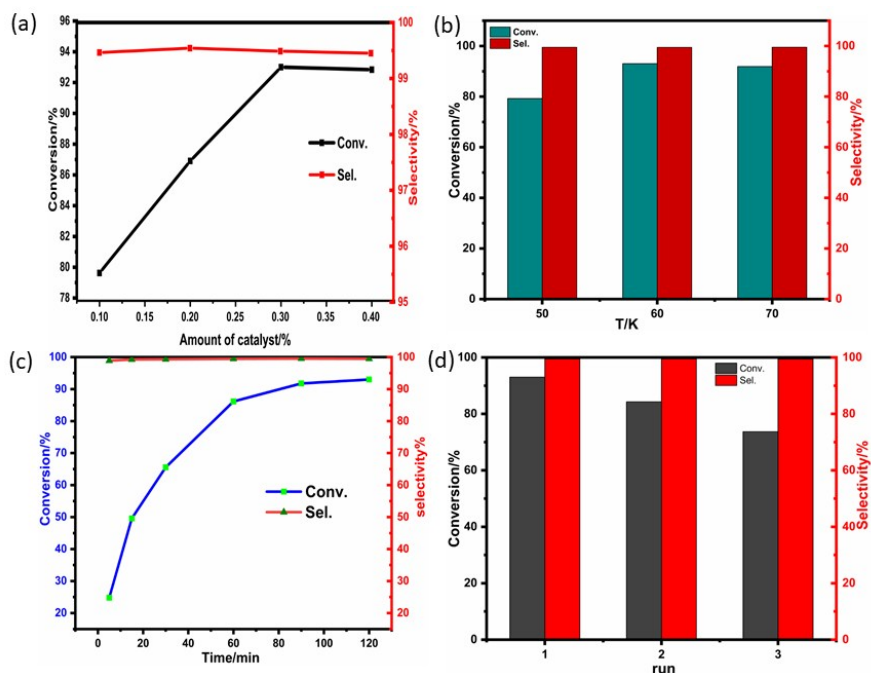

**Fig. S7.** (a) The influence of catalyst amount; (b) The influence of temperature; (c) Time tracking tests of **Co1**; (d) Recyclability of the **Co1** catalyst.

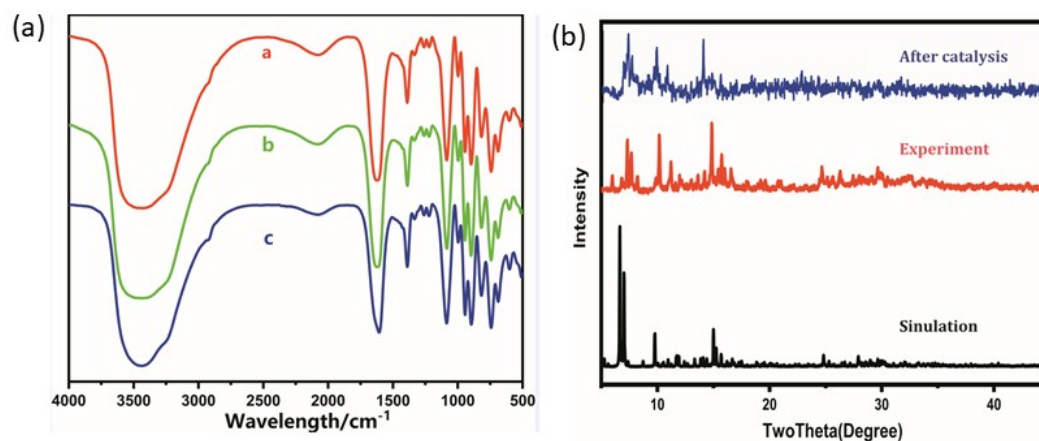

**Fig. S8.** (a) a: Infrared spectra of compound **Co1** before the catalytic reaction; b: After the reaction with benzaldehyde; c: After three recycled compound **Co1**. (b) PXRD patterns of **Co1** before and after recycle catalysis.

**Table S1.** BVS values of W, Se, Co and P atoms of compound **Co1**.

| Atom | BVS  | Atom | BVS  | Atom | BVS  | Atom | BVS  |
|------|------|------|------|------|------|------|------|
| W1   | 6.11 | W7   | 6.46 | Se1  | 3.91 | P1   | 4.34 |
| W2   | 6.41 | W8   | 6.36 | Se2  | 3.77 | P2   | 4.17 |
| W3   | 6.40 | W9   | 6.24 | Co1  | 2.01 | P3   | 4.28 |
| W4   | 6.19 | W10  | 6.54 | Co2  | 2.02 | P4   | 4.40 |
| W5   | 6.37 | W11  | 6.17 | Co3  | 1.98 | P5   | 4.38 |
| W6   | 6.42 | W12  | 6.38 | Co4  | 1.96 | P6   | 4.33 |

**Table S2.** Bond length of compound **Co1**.

| Bond    | Bond length | Bond    | Bond length | Bond    | Bond length |
|---------|-------------|---------|-------------|---------|-------------|
| W1-O11  | 1.918(11)   | W5-O4   | 2.281(9)    | W9-O39  | 1.892(11)   |
| W1-O18  | 1.899(10)   | W5-O5   | 2.197(9)    | W9-O42  | 1.930(12)   |
| W1-O21  | 2.351(11)   | W5-O8   | 1.897(12)   | W9-O43  | 2.350(9)    |
| W1-O22  | 2.144(12)   | W5-O16  | 1.880(13)   | W9-O48  | 2.182(9)    |
| W1-O32  | 1.745(15)   | W5-O29  | 1.741(12)   | W9-O51  | 1.728(11)   |
| W1-O34  | 1.737(15)   | W5-O33  | 1.716(10)   | W9-O66  | 1.753(12)   |
| W2-O7   | 1.899(10)   | W6-O4   | 2.298(11)   | W10-O42 | 1.923(10)   |
| W2-O10  | 2.155(10)   | W6-O6   | 2.207(10)   | W10-O43 | 2.297(11)   |
| W2-O11  | 1.928(12)   | W6-O8   | 1.944(10)   | W10-O49 | 2.158(10)   |
| W2-O14  | 1.724(11)   | W6-O18  | 1.895(10)   | W10-O53 | 1.900(9)    |
| W2-O21  | 2.296(10)   | W6-O20  | 1.738(12)   | W10-O63 | 1.721(13)   |
| W2-O28  | 1.732(11)   | W6-O25  | 1.708(14)   | W10-O65 | 1.687(16)   |
| W3-O7   | 1.885(10)   | W7-O45  | 1.902(10)   | W11-O44 | 2.216(9)    |
| W3-O9   | 2.348(11)   | W7-O46  | 1.899(11)   | W11-O50 | 1.916(11)   |
| W3-O15  | 2.159(10)   | W7-O47  | 2.317(11)   | W11-O53 | 1.889(10)   |
| W3-O23  | 1.917(10)   | W7-O52  | 2.149(12)   | W11-O54 | 2.318(11)   |
| W3-O27  | 1.738(13)   | W7-O64  | 1.743(13)   | W11-O58 | 1.739(11)   |
| W3-O30  | 1.729(13)   | W7-O69  | 1.723(13)   | W11-O62 | 1.716(13)   |
| W4-O3   | 2.191(9)    | W8-O39  | 1.914(11)   | W12-O40 | 2.183(9)    |
| W4-O9   | 2.309(10)   | W8-O41  | 2.171(9)    | W12-O46 | 1.886(11)   |
| W4-O16  | 1.917(12)   | W8-O45  | 1.953(11)   | W12-O50 | 1.917(12)   |
| W4-O17  | 1.740(12)   | W8-O47  | 2.282(10)   | W12-O54 | 2.302(10)   |
| W4-O23  | 1.918(11)   | W8-O56  | 1.704(11)   | W12-O55 | 1.711(10)   |
| W4-O31  | 1.748(11)   | W8-O59  | 1.733(11)   | W12-O60 | 1.716(10)   |
| Se1-O4  | 1.713(10)   | Co1-O19 | 2.055(13)   | Co2-O2  | 2.052(11)   |
| Se1-O9  | 1.694(10)   | Co1-O24 | 2.098(10)   | Co2-O26 | 2.109(10)   |
| Se1-O21 | 1.704(10)   | Co1-O38 | 2.039(14)   | Co2-O61 | 2.057(10)   |
| Se2-O43 | 1.696(10)   | Co1-O57 | 2.140(10)   | Co2-O70 | 2.080(9)    |
| Se2-O47 | 1.709(11)   | Co1-N1  | 2.174(13)   | Co2-N2  | 2.156(11)   |
| Se2-O54 | 1.700(9)    | Co1-N4  | 2.156(13)   | Co2-N5  | 2.167(13)   |
| Co3-O35 | 2.028(11)   | Co3-N3  | 2.143(13)   | Co4-O3W | 2.106(10)   |
| Co3-O36 | 2.152(9)    | Co3-N6  | 2.139(12)   | Co4-O4W | 2.083(10)   |
| Co3-O68 | 2.103(10)   | Co4-O1W | 2.146(10)   | Co4-O36 | 2.093(9)    |
| Co3-O72 | 2.079(10)   | Co4-O2W | 2.109(10)   | Co4-O68 | 2.132(9)    |

**Table S3.** Angel length of compound **Co1**.

| Bond       | Angel    | Bond       | Angel    | Bond       | Angel    |
|------------|----------|------------|----------|------------|----------|
| O22-W1-O21 | 80.8(4)  | O7-W2-O10  | 78.1(4)  | O7-W3-O9   | 83.1(4)  |
| O32-W1-O11 | 96.8(6)  | O7-W2-O11  | 150.8(4) | O7-W3-O15  | 79.6(4)  |
| O32-W1-O18 | 96.5(5)  | O7-W2-O21  | 83.7(4)  | O7-W3-O23  | 149.5(4) |
| O32-W1-O21 | 87.1(6)  | O10-W2-O21 | 78.5(4)  | O15-W3-O9  | 79.6(4)  |
| O32-W1-O22 | 167.8(6) | O11-W2-O10 | 81.2(5)  | O23-W3-O9  | 70.8(4)  |
| O34-W1-O11 | 100.2(5) | O11-W2-O21 | 72.1(4)  | O23-W3-O15 | 80.3(4)  |
| O34-W1-O18 | 102.6(6) | O14-W2-O7  | 101.6(5) | O27-W3-O7  | 102.2(6) |
| O34-W1-O21 | 168.2(5) | O14-W2-O10 | 91.3(5)  | O27-W3-O9  | 165.4(5) |
| O34-W1-O22 | 90.1(7)  | O14-W2-O11 | 99.2(5)  | O27-W3-O15 | 87.9(5)  |
| O34-W1-O32 | 102.1(8) | O14-W2-O21 | 167.4(5) | O27-W3-O23 | 99.9(6)  |
| O22-W1-O21 | 80.8(4)  | O14-W2-O28 | 102.7(6) | O30-W3-O7  | 97.7(5)  |
| O32-W1-O11 | 96.8(6)  | O28-W2-O7  | 97.3(6)  | O30-W3-O9  | 87.6(5)  |
| O32-W1-O18 | 96.5(5)  | O28-W2-O10 | 165.9(5) | O30-W3-O15 | 167.2(6) |
| O32-W1-O21 | 87.1(6)  | O28-W2-O11 | 97.9(6)  | O30-W3-O23 | 96.7(5)  |
| O32-W1-O22 | 167.8(6) | O28-W2-O21 | 87.7(5)  | O30-W3-O27 | 105.0(7) |
| O3-W4-O9   | 77.9(3)  | O5-W5-O4   | 78.7(3)  | O6-W6-O4   | 77.5(4)  |
| O16-W4-O3  | 78.3(4)  | O8-W5-O4   | 71.6(4)  | O8-W6-O4   | 70.5(4)  |
| O16-W4-O9  | 83.8(4)  | O8-W5-O5   | 82.5(4)  | O8-W6-O6   | 82.1(4)  |
| O16-W4-O23 | 151.0(4) | O16-W5-O4  | 84.6(4)  | O18-W6-O4  | 85.0(4)  |
| O17-W4-O3  | 90.1(5)  | O16-W5-O5  | 78.2(4)  | O18-W6-O6  | 79.4(4)  |
| O17-W4-O9  | 165.7(5) | O16-W5-O8  | 151.9(4) | O18-W6-O8  | 151.9(5) |
| O17-W4-O16 | 101.5(5) | O29-W5-O4  | 88.6(5)  | O20-W6-O4  | 88.1(5)  |
| O17-W4-O23 | 99.2(5)  | O29-W5-O5  | 166.9(5) | O20-W6-O6  | 165.3(5) |
| O17-W4-O31 | 104.6(5) | O29-W5-O8  | 96.8(6)  | O20-W6-O8  | 96.2(5)  |
| O23-W4-O3  | 81.6(4)  | O29-W5-O16 | 97.4(6)  | O20-W6-O18 | 96.5(5)  |
| O23-W4-O9  | 71.6(4)  | O33-W5-O4  | 165.1(5) | O25-W6-O4  | 165.0(5) |
| O31-W4-O3  | 165.0(5) | O33-W5-O5  | 90.0(5)  | O25-W6-O6  | 90.8(5)  |
| O31-W4-O9  | 87.9(5)  | O33-W5-O8  | 97.5(5)  | O25-W6-O8  | 98.9(5)  |
| O31-W4-O16 | 95.6(6)  | O33-W5-O16 | 102.8(5) | O25-W6-O18 | 102.2(5) |
| O31-W4-O23 | 98.7(6)  | O33-W5-O29 | 103.0(5) | O25-W6-O20 | 103.8(6) |
| O45-W7-O47 | 71.2(4)  | O39-W8-O41 | 78.1(4)  | O39-W9-O42 | 151.3(4) |
| O45-W7-O52 | 81.2(4)  | O39-W8-O45 | 151.5(4) | O39-W9-O43 | 83.6(4)  |
| O46-W7-O45 | 149.1(4) | O39-W8-O47 | 85.5(4)  | O39-W9-O48 | 79.7(4)  |
| O46-W7-O47 | 81.7(4)  | O41-W8-O47 | 78.4(4)  | O42-W9-Na6 | 125.0(3) |
| O46-W7-O52 | 79.5(4)  | O45-W8-O41 | 81.2(4)  | O42-W9-O43 | 71.3(4)  |
| O52-W7-O47 | 79.5(4)  | O45-W8-O47 | 71.1(4)  | O42-W9-O48 | 82.1(4)  |
| O64-W7-O45 | 101.0(5) | O56-W8-O39 | 101.3(5) | O48-W9-O43 | 79.7(3)  |
| O64-W7-O46 | 103.1(5) | O56-W8-O41 | 92.1(5)  | O51-W9-O39 | 101.6(5) |



|             |          |             |          |             |          |
|-------------|----------|-------------|----------|-------------|----------|
| O64-W7-O47  | 167.9(6) | O56-W8-O45  | 98.9(5)  | O51-W9-O42  | 100.6(5) |
| O64-W7-O52  | 90.4(6)  | O56-W8-O47  | 167.1(5) | O51-W9-O43  | 167.9(5) |
| O69-W7-O45  | 95.9(5)  | O56-W8-O59  | 102.3(6) | O51-W9-O48  | 90.3(5)  |
| O69-W7-O46  | 98.2(6)  | O59-W8-O39  | 96.7(5)  | O51-W9-O66  | 103.1(6) |
| O69-W7-O47  | 88.9(6)  | O59-W8-O41  | 165.4(5) | O66-W9-O39  | 95.2(5)  |
| O69-W7-O52  | 168.3(6) | O59-W8-O45  | 98.4(6)  | O66-W9-O42  | 97.3(5)  |
| O69-W7-O64  | 101.3(8) | O59-W8-O47  | 87.6(5)  | O66-W9-O43  | 87.2(5)  |
| O42-W10-O43 | 72.7(4)  | O44-W11-O54 | 80.9(4)  | O40-W12-O54 | 78.2(4)  |
| O42-W10-O49 | 82.9(4)  | O50-W11-O44 | 80.4(4)  | O46-W12-O40 | 78.5(4)  |
| O49-W10-O43 | 77.4(4)  | O50-W11-O54 | 70.8(4)  | O46-W12-O50 | 150.7(4) |
| O53-W10-O42 | 151.9(4) | O53-W11-O44 | 78.2(4)  | O46-W12-O54 | 83.8(4)  |
| O53-W10-O43 | 83.4(4)  | O53-W11-O50 | 148.2(4) | O50-W12-O40 | 81.7(4)  |
| O53-W10-O49 | 77.4(4)  | O53-W11-O54 | 82.7(4)  | O50-W12-O54 | 71.2(4)  |
| O63-W10-O42 | 97.5(5)  | O58-W11-O44 | 167.2(5) | O55-W12-O40 | 90.6(4)  |
| O63-W10-O43 | 87.4(6)  | O58-W11-O50 | 97.8(5)  | O55-W12-O46 | 102.4(5) |
| O63-W10-O49 | 163.9(7) | O58-W11-O53 | 97.8(4)  | O55-W12-O50 | 99.1(5)  |
| O63-W10-O53 | 96.0(5)  | O58-W11-O54 | 86.5(5)  | O55-W12-O54 | 166.0(5) |
| O65-W10-O42 | 99.1(6)  | O62-W11-O44 | 90.6(5)  | O55-W12-O60 | 102.7(5) |
| O65-W10-O43 | 167.9(5) | O62-W11-O50 | 100.7(6) | O60-W12-O40 | 166.7(5) |
| O65-W10-O49 | 93.0(6)  | O62-W11-O53 | 102.8(6) | O60-W12-O46 | 97.8(5)  |
| O65-W10-O53 | 101.8(6) | O62-W11-O54 | 168.8(5) | O60-W12-O50 | 96.6(5)  |
| O65-W10-O63 | 102.7(7) | O62-W11-O58 | 102.2(6) | O60-W12-O54 | 88.7(5)  |
| O9-Se1-O4   | 99.6(5)  | O43-Se2-O47 | 101.1(5) | Co4-O36-Co3 | 97.9(4)  |
| O9-Se1-O21  | 99.4(5)  | O43-Se2-O54 | 98.1(5)  | Co3-O68-Co4 | 98.2(4)  |
| O21-Se1-O4  | 99.2(5)  | O54-Se2-O47 | 99.4(5)  |             |          |

**Table S4.** Crystallographic data of three compounds.

| parameter                    | Co1                                                                                                                                               | Co2                                                                                                                                                           | Ni3                                                                                                                                                           |
|------------------------------|---------------------------------------------------------------------------------------------------------------------------------------------------|---------------------------------------------------------------------------------------------------------------------------------------------------------------|---------------------------------------------------------------------------------------------------------------------------------------------------------------|
| Empirical formula            | C <sub>36</sub> H <sub>48</sub> Co <sub>9</sub> N <sub>12</sub> Na <sub>14</sub> O <sub>202</sub> P <sub>12</sub> Se <sub>4</sub> W <sub>24</sub> | C <sub>18</sub> H <sub>24</sub> Co <sub>4</sub> Cs <sub>2</sub> N <sub>6</sub> Na <sub>2</sub> O <sub>87</sub> P <sub>6</sub> Se <sub>2</sub> W <sub>12</sub> | C <sub>18</sub> H <sub>24</sub> Cs <sub>2</sub> N <sub>6</sub> Na <sub>2</sub> Ni <sub>4</sub> O <sub>90</sub> P <sub>6</sub> Se <sub>2</sub> W <sub>12</sub> |
| Formula weight               | 9832.97                                                                                                                                           | 4813.89                                                                                                                                                       | 4861.01                                                                                                                                                       |
| T (K)                        | 296.15                                                                                                                                            | 296.15                                                                                                                                                        | 296.15                                                                                                                                                        |
| Space group                  | P-1                                                                                                                                               | P-1                                                                                                                                                           | P-1                                                                                                                                                           |
| Crystal system               | triclinic                                                                                                                                         | triclinic                                                                                                                                                     | triclinic                                                                                                                                                     |
| a / Å                        | 18.1321(14)                                                                                                                                       | 16.7391(10)                                                                                                                                                   | 16.9074(19)                                                                                                                                                   |
| b / Å                        | 18.8474(14)                                                                                                                                       | 19.6892(13)                                                                                                                                                   | 19.793(2)                                                                                                                                                     |
| c / Å                        | 20.3150(15)                                                                                                                                       | 24.9113(15)                                                                                                                                                   | 24.551(3)                                                                                                                                                     |
| α / deg                      | 85.5630(10)                                                                                                                                       | 91.1360(10)                                                                                                                                                   | 90.418(2)                                                                                                                                                     |
| β / deg                      | 86.4740(10)                                                                                                                                       | 103.4710(10)                                                                                                                                                  | 104.442(2)                                                                                                                                                    |
| γ / deg                      | 62.9300(10)                                                                                                                                       | 109.9070(10)                                                                                                                                                  | 111.826(2)                                                                                                                                                    |
| V / Å <sup>3</sup>           | 6160.7(8)                                                                                                                                         | 7463.0(8)                                                                                                                                                     | 7340.0(14)                                                                                                                                                    |
| Z                            | 1                                                                                                                                                 | 2                                                                                                                                                             | 2                                                                                                                                                             |
| μ / mm <sup>-1</sup>         | 12.543                                                                                                                                            | 10.754                                                                                                                                                        | 10.998                                                                                                                                                        |
| F (000)                      | 4453.0                                                                                                                                            | 4312.0                                                                                                                                                        | 4368.0                                                                                                                                                        |
| Crystal size/mm <sup>3</sup> | 0.41 × 0.23 × 0.18                                                                                                                                | 0.39 × 0.36 × 0.26                                                                                                                                            | 0.36 × 0.25 × 0.21                                                                                                                                            |
| Limiting indices             | -21 ≤ h ≤ 21<br>-22 ≤ k ≤ 22<br>-23 ≤ l ≤ 24                                                                                                      | -19 ≤ h ≤ 8<br>-20 ≤ k ≤ 23<br>-29 ≤ l ≤ 29                                                                                                                   | -20 ≤ h ≤ 19<br>-23 ≤ k ≤ 18<br>-28 ≤ l ≤ 29                                                                                                                  |
| Reflections collected        | 31999                                                                                                                                             | 38874                                                                                                                                                         | 38211                                                                                                                                                         |
| R <sub>int</sub>             | 0.0448                                                                                                                                            | 0.0362                                                                                                                                                        | 0.0444                                                                                                                                                        |
| GOF                          | 1.074                                                                                                                                             | 1.026                                                                                                                                                         | 0.940                                                                                                                                                         |
| R indexes [I ≥ 2σ(I)]        | R1= 0.0601, wR2= 0.1596                                                                                                                           | R1= 0.0609, wR2= 0.1636                                                                                                                                       | R1=0.0554, wR2= 0.1250                                                                                                                                        |
| R indexes [all data]         | R1= 0.0844, wR2= 0.1758                                                                                                                           | R1= 0.1025, wR2= 0.1923                                                                                                                                       | R1=0.1081, wR2= 0.1513                                                                                                                                        |
